# Supplementary material for: Flexible, robust and washable bacterial cellulose/silver nanowire conductive paper for high-performance electromagnetic interference shielding
Source: Royal Society of Chemistry journal article supplement (doi:10.1039/d1ta07900j), 2021-12-04
Supplement: d1ta07900j1.pdf [file d1ta07900j1.pdf]

## Electronic Supplementary Information

### Flexible, Robust, and Washable Bacterial Cellulose/Silver Nanowire Conductive Paper for High-Performance Electromagnetic Interference Shielding Effectiveness

**Jie Wang**<sup>1,#</sup>, **Xiangbo Zhu**<sup>1,#</sup>, **Peixun Xiong**<sup>2</sup>, **Junpin Tu**<sup>1</sup>, **Zhiwei Yang**<sup>1</sup>,  
**Fanglian Yao**<sup>3</sup>, **Miguel Gama**<sup>4</sup>, **Quanchao Zhang**<sup>1\*</sup>, **Honglin Luo**<sup>1,2,\*</sup>, **Yizao  
Wan**<sup>1,2,\*</sup>

<sup>1</sup> Jiangxi Key Laboratory of Nanobiomaterials, Institute of Advanced Materials, East China Jiaotong University, Nanchang 330013, China.

<sup>2</sup> School of Materials Science and Engineering, Tianjin University, Tianjin 300072, China.

<sup>3</sup> Department of Polymer Science and Key Laboratory of Systems Bioengineering of Ministry of Education, School of Chemical Engineering and Technology, Tianjin University, Tianjin 300072, China.

<sup>4</sup> Centro de Engenharia Biológica, Universidade do Minho, Campus de Gualtar, P 4715-057 Braga, Portugal.

# J. Wang and X. Zhu contributed equally to this work.

\*Corresponding authors.

E-mail: zhangquanchao2006@126.com; hlluotju@126.com; yzwantju@126.com

TG analysis was performed to determine the weight ratio of AgNW in the as-prepared BC/AgNW papers. The content of AgNW in BC/AgNW paper was calculated according to the TGA data using the following equation [S1]:

$$W_{AgNW} = \frac{W_b - W_a}{1 - W_a} \times 100\%$$

where  $W_{AgNW}$  is the weight ratio of AgNW in BC/AgNW, and  $W_a$  and  $W_b$  are the residual weight ratios of BC and BC/AgNW after thermal degradation, respectively.

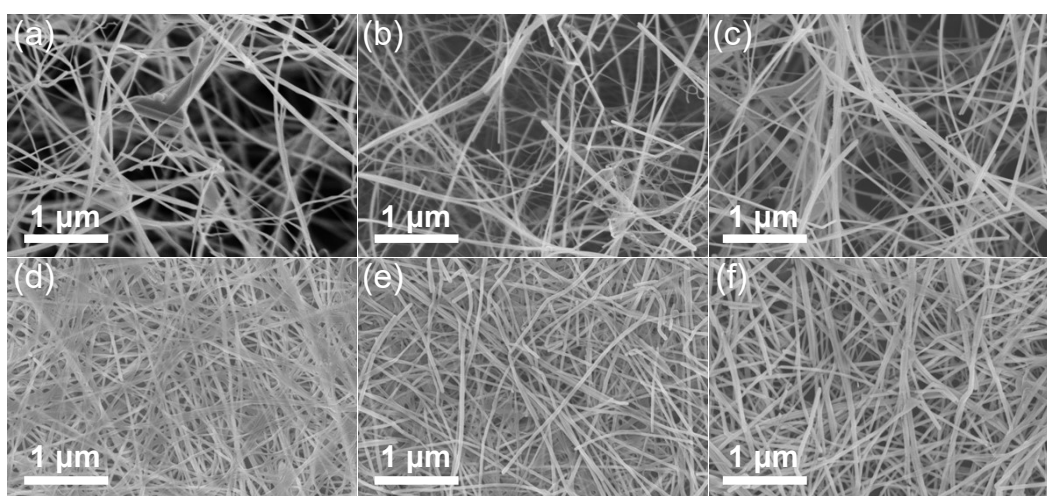

**Figure S1.** SEM images of the (a) BC/AgNW-1, (b) BC/AgNW-2, and (c) BC/AgNW-3 aerogels; SEM images of the (d) BC/AgNW-1, (e) BC/AgNW-2, and (f) BC/AgNW-3 papers.

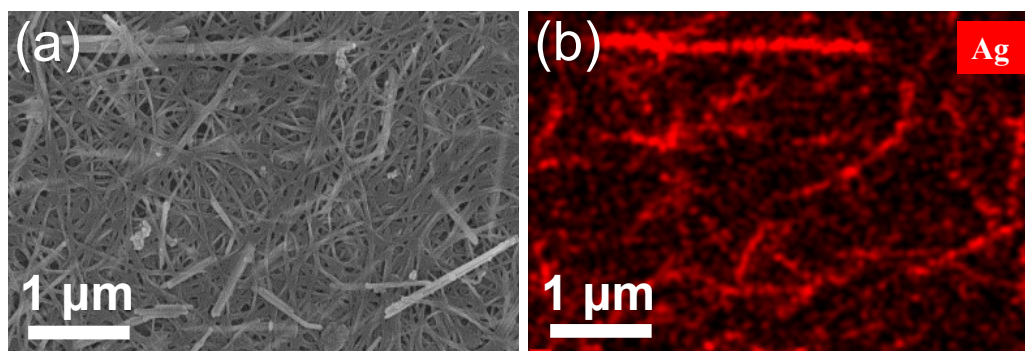

**Figure S2.** (a) SEM image of the BC/AgNW-4 paper and a corresponding EDX mapping of AgNWs.

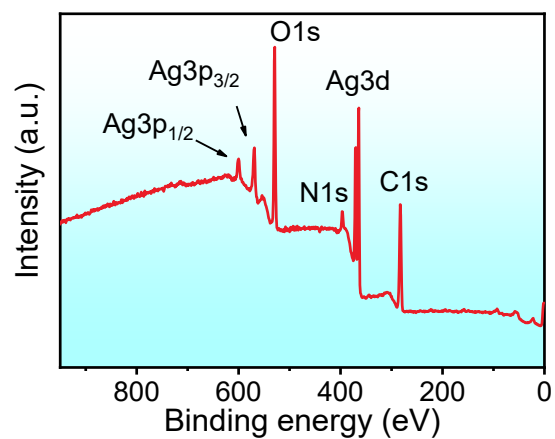

**Figure S3.** XPS survey spectrum of the BC/AgNW-4 paper.

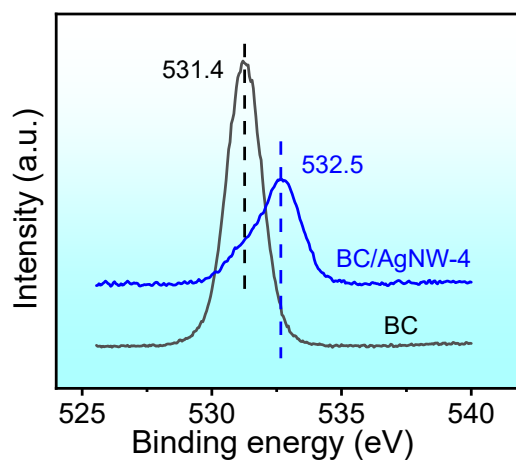

**Figure S4.** High-resolution XPS spectrum of O1s of the BC and BC/AgNW-4 papers.

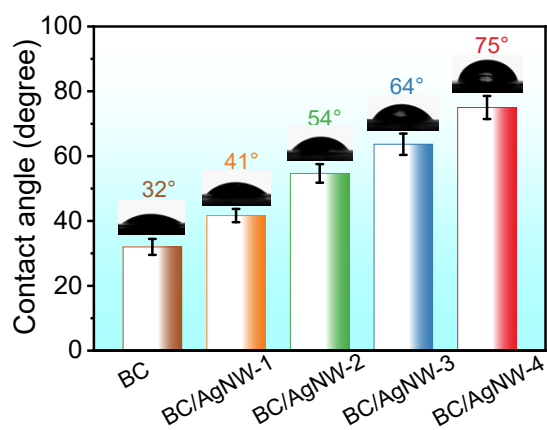

**Figure S5.** Water contact angles of the bare BC and BC/AgNW papers.

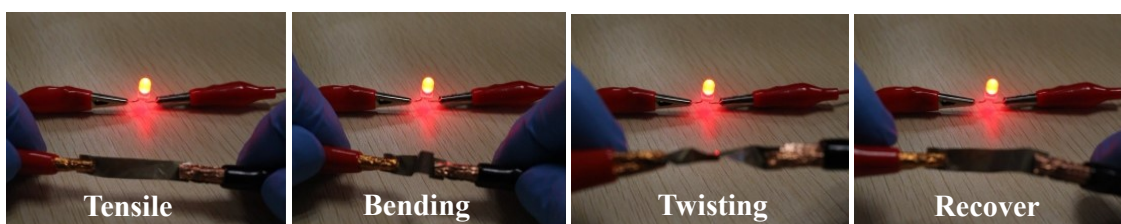

**Figure S6.** The brightness of the LED lamps does not change when the BC/AgNW-4 paper experienced tensile, bending, and twisting.

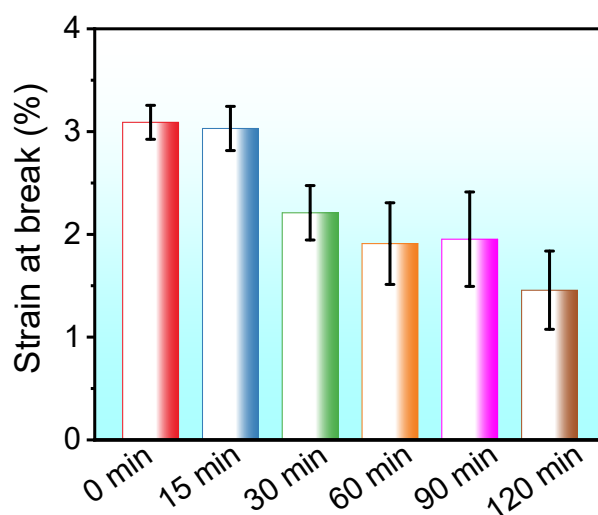

**Figure S7.** Strain at break of the BC/AgNW-4 paper after washing with water.

**Movies:**

**Movie S1:** Variation in electrical resistance of the BC/AgNW-4 paper under bending state for many times.

**Movie S2:** Variation in electrical resistance of the BC/AgNW-4 paper under folding state for many times.

**Movie S3:** Variation in electrical resistance of the BC/AgNW-4 paper after exposure to water, brine, ethanol, and vegetable oil.

**Movie S4:** The washing experiment for the BC/AgNW-4 paper with a stirring speed of 200 rpm.

**Table S1.** Comparisons of electrical conductivity between BC/AgNW and other AgNW-based materials.

| <b>Materials</b>    | <b>AgNW content<br/>(wt.%)</b> | <b>Conductivity<br/>(S m<sup>-1</sup>)</b> | <b>Ref.</b> |
|---------------------|--------------------------------|--------------------------------------------|-------------|
| BC/AgNW-1           | 11.4                           | 67718                                      | this work   |
| BC/AgNW-2           | 23.8                           | 121649                                     |             |
| BC/AgNW-3           | 30.4                           | 330046                                     |             |
| BC/AgNW-4           | 36.5                           | 608365                                     |             |
| H-AgNW/cellulose    | 8.1                            | 3369                                       | [S1]        |
| AgNW/PPy/PDA        | 50.0                           | 120672                                     | [S2]        |
| AgNW/CNT/cellulose  | 2.0                            | 283                                        | [S3]        |
| AgNW/C              | 67.0                           | 363                                        | [S4]        |
| AgNW/PU             | 3.0                            | 1227                                       | [S5]        |
| PU-AgNW/CFF         | 5.5                            | 15390                                      | [S6]        |
| AgNW/cellulose      | 9.6                            | 6751                                       | [S7]        |
| AgNW/PVDF           | 0.5                            | 26500                                      | [S8]        |
| AgNW/MXene/CNF      | 5.0                            | 274360                                     | [S9]        |
| AgNW/Mxene/CNF      | 20.0                           | 37378                                      | [S10]       |
| AgNW/NiNP/cellulose | 2.7                            | 6331                                       | [S11]       |
| AgNW/cellulose      | 50.0                           | 557100                                     | [S12]       |
| AgNW/Nanocellulose  | 50.0                           | 200000                                     | [S13]       |
| AgNW/GO             | 7.8                            | 225580                                     | [S14]       |
| AgNW/BMF            | 51.4                           | 1800                                       | [S15]       |

**Table S2.** Comparisons of shielding effectiveness (SE) and specific shielding effectiveness (SSE) between BC/AgNW and other AgNW-based materials.

| Materials           | AgNW content (wt.%) | SE (dB) | Specific EMI SE (dB mm <sup>-1</sup> ) | Ref.      |
|---------------------|---------------------|---------|----------------------------------------|-----------|
| BC/AgNW-1           | 11.4                | 9.6     | 960.0                                  | This work |
| BC/AgNW-2           | 23.8                | 36.9    | 3690.0                                 |           |
| BC/AgNW-3           | 30.4                | 53.3    | 5330.0                                 |           |
| BC/AgNW-4           | 36.5                | 64.0    | 6400.0                                 |           |
| H-AgNW/cellulose    | 8.1                 | 46.1    | 271.0                                  | [S1]      |
| AgNW/PPy/PDA        | 50.0                | 48.4    | 2420.0                                 | [S2]      |
| AgNW/CNT/cellulose  | 2.0                 | 23.8    | 2.0                                    | [S3]      |
| AgNW/C              | 67.0                | 70.1    | 38.0                                   | [S4]      |
| AgNW/PU             | 3.0                 | 63.9    | 107.0                                  | [S5]      |
| PU-AgNW/CFE         | 5.5                 | 106.0   | 294.0                                  | [S6]      |
| AgNW/cellulose      | 9.6                 | 48.6    | 240.0                                  | [S7]      |
| AgNW/PVDF           | 0.5                 | 107.2   | 1093.9                                 | [S8]      |
| AgNW/MXene/CNF      | 5.0                 | 51.8    | 8633.3                                 | [S9]      |
| AgNW/MXene/CNF      | 20.0                | 55.9    | 1597.1                                 | [S10]     |
| AgNW/NiNP/cellulose | 2.7                 | 88.4    | 382.7                                  | [S11]     |
| AgNW/cellulose      | 50.0                | 101.0   | 2270.0                                 | [S12]     |
| AgNW/Nanocellulose  | 50.0                | 70.5    | 35.0                                   | [S13]     |
| AgNW/GO             | 7.8                 | 62.0    | 7750.0                                 | [S14]     |
| AgNW/PHBV           | 5.3                 | 45.9    | 2550.0                                 | [S16]     |
| AgNW/PDMS           | 3.1                 | 74.7    | 74.7                                   | [S17]     |
| AgNW/PI             | 20.5                | 23.5    | 5.0                                    | [S18]     |
| AgNW/WPU            | 28.6                | 64.0    | 28.0                                   | [S19]     |
| AgNW/Silk/MXene     | 16.0                | 54.0    | 450.0                                  | [S20]     |
| AgNW/PANI           | 43.4                | 48.0    | 3830.0                                 | [S21]     |
| AgNW/ANF-MXene      | 1.8                 | 48.1    | 1069.0                                 | [S22]     |

## References

- [S1] F. Ren, H. Guo, Z. Guo, Y. Jin, H. Duan, P. Ren, D. Yan, *Polymers*, **2019**, *11*, 1486.
- [S2] Y. Wang, F. Gu, L. Ni, K. Liang, K. Marcus, S. Liu, F. Yang, J. Chen, Z. Feng, *Nanoscale*, 2017, **9**, 18318-18325.
- [S3] H. Choi, T. Lee, S. Lee, J. Lim, Y. Jeong, *Compos. Sci. Technol.*, 2017, **150**, 45-53.
- [S4] Y. Wan, P. Zhu, S. Yu, R. Sun, C. Wong, W. Liao, *Small*, 2018, **14**, 1800534.
- [S5] L. Jia, K. Ding, R. Ma, H. Wang, W. Sun, D. Yan, B. Li, Z. Li, *Adv. Mater. Technol.*, 2019, **4**, 1800503.
- [S6] L. Jia, L. Xu, F. Ren, P. Ren, D. Yan, Z. Li, *Carbon*, 2019, **144**, 101-108.
- [S7] T. Lee, S. Lee, Y. Jeong, *ACS Appl. Mater. Interfaces*, 2016, **8**, 13123-13132.
- [S8] J. Qian, Z. Zhang, R. Bao, Z. Liu, M. Yang, W. Yang, *Polym. Compos.*, 2021, **42**, 522-531.
- [S9] Q. Liu, Y. Zhang, Y. Liu, Z. Liu, B. Zhang, Q. Zhang, *J. Alloy. Compd.*, 2021, **860**, 158151.
- [S10] B. Zhou, Q. Li, P. Xu, Y. Feng, J. Ma, C. Liu, C. Shen, *Nanoscale*, 2021, **13**, 2378-2388.
- [S11] Y. Zhan, X. Hao, L. Wang, X. Jiang, Y. Cheng, C. Wang, Y. Meng, H. Xia, Z. Chen, *ACS Appl. Mater. Interfaces*, 2021, **13**, 14623-14633.
- [S12] C. Liang, K. Ruan, Y. Zhang, J. Gu, *ACS Appl. Mater. Interfaces*, 2020, **12**, 18023-18031.
- [S13] Z. Zeng, T. Wu, D. Han, Q. Ren, G. Siqueira, G. Nyström, *ACS Nano*, 2020, **14**, 2927-2938.
- [S14] H. Jia, X. Yang, Q. Kong, L. Xie, Q. Guo, G. Song, L. Liang, J. Chen, Y. Li, C. Chen, *J. Mater. Chem. A*, 2021, **9**, 1180-1191.
- [S15] C. Weng, G. Wang, Z. Dai, Y. Pei, L. Liu, Z. Zhang, *Nanoscale*, 2019, **11**, 22804-22812.
- [S16] S. Yang, Y. Wang, Y. Song, L. Jia, G. Zhong, L. Xu, D. Yan, J. Lei, Z. Li, *J. Mater. Chem. C*, 2021, **9**, 3307-3315.

- [S17] X. Yu, X. Liang, T. Zhao, P. Zhu, R. Sun, C. Wong, *Mater. Lett.*, 2021, **285**, 129065.
- [S18] J. Ma, M. Zhan, K. Wang, *ACS Appl. Mater. Interfaces*, 2015, **7**, 563-576.
- [S19] Z. Zeng, M. Chen, Y. Pei, S. Shahabadi, B. Che, P. Wang, X. Lu, *ACS Appl. Mater. Interfaces*, 2017, **9**, 32211-32219.
- [S20] L. Liu, W. Chen, H. Zhang, Q. Wang, F. Guan, Z. Yu, *Adv. Funct. Mater.*, 2019, **29**, 1905197.
- [S21] F. Fang, Y. Li, H. Xiao, N. Hu, S. Fu, *J. Mater. Chem. C*, 2016, **4**, 4193-4203.
- [S22] Z. Ma, S. Kang, J. Ma, L. Shao, Y. Zhang, C. Liu, A. Wei, X. Xiang, L. Wei, J. Gu, *ACS Nano*, 2020, **14**, 8368-8382.
